# Supplementary material
Source: PubMed Central journal article supplement (PMC4031556)

# Gα Endocytosis by a Cascade of Ubiquitin Binding Domain Proteins is Required for Sustained Morphogenesis and Proper Mating in Yeast

Gauri Dixit, Rachael Baker, Carly M. Sacks, Matthew P. Torres, and Henrik G. Dohlman

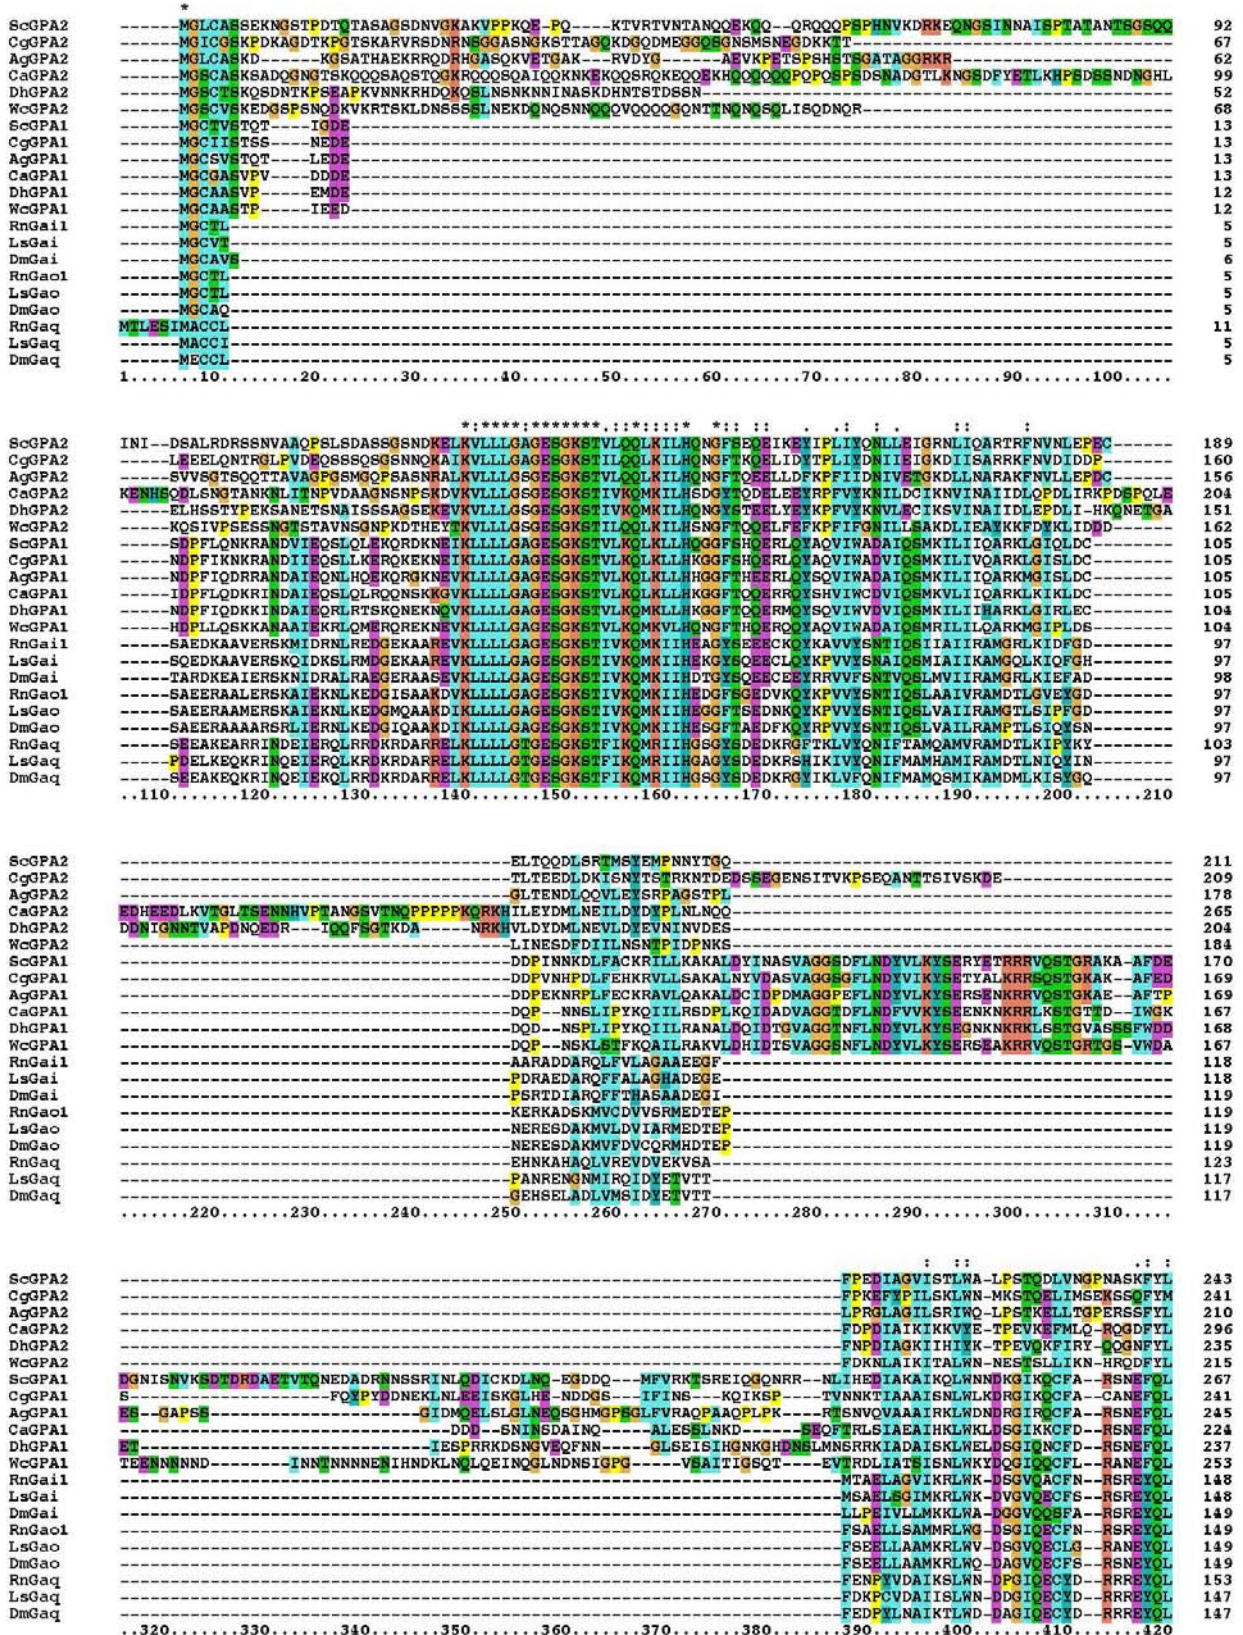

Supplement: supp_M114.566117_jbc.M114.566117-1.pdf [file supp_M114.566117_jbc.M114.566117-1.pdf]
